# Supplementary material for: Clinical Outcome of Nerve Decompression Surgery for Migraine Improves with Nerve Wrap
Source: PubMed Central journal article supplement — Plast Reconstr Surg Glob Open. 2021 Oct 22;9(10):e3886. doi: 10.1097/GOX.0000000000003886 (PMC8542141; doi:10.1097/gox.0000000000003886), 2021-10-22

ADM nerve wrap

Time from surgery to outcomes

Trigger 2

Trigger 4

Trigger 5

Trigger 6

Ergotamine

Propranolol

Bipolar comotbidity

Reoperation

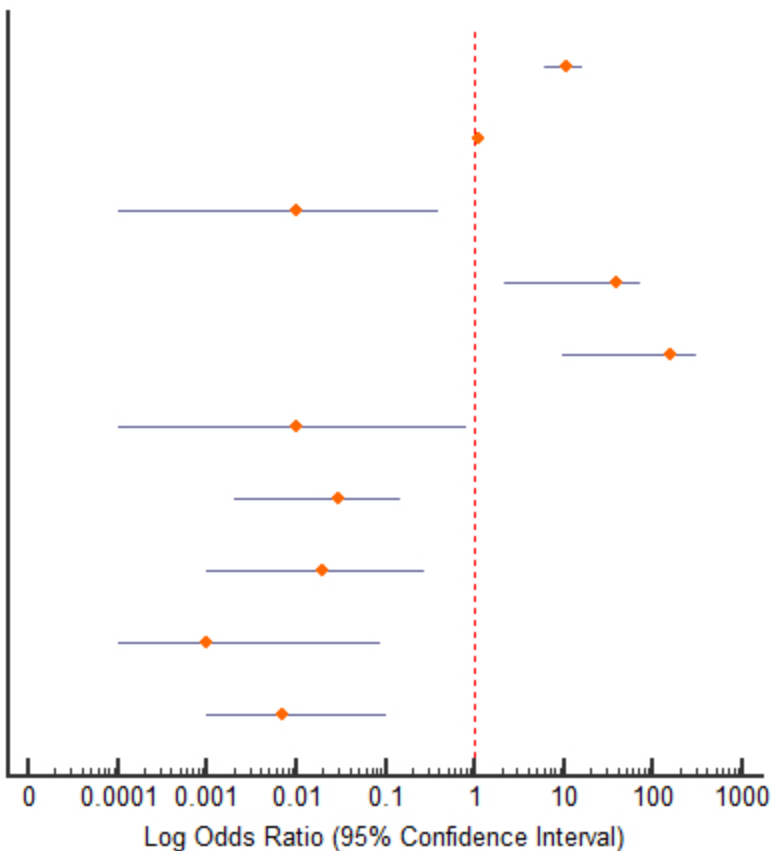

Supplement: gox-9-e3886-s002.pdf [file gox-9-e3886-s002.pdf]
